# Supplementary figures and images for: Enzyme replacement therapy for Farber disease: Proof-of-concept studies in cells and mice
Source: PubMed Central journal article supplement — BBA Clin. 2017 Feb 13;7:85–96. doi: 10.1016/j.bbacli.2017.02.001 (PMC5338723; doi:10.1016/j.bbacli.2017.02.001), 2017-02-13

Supplemental Fig. 1

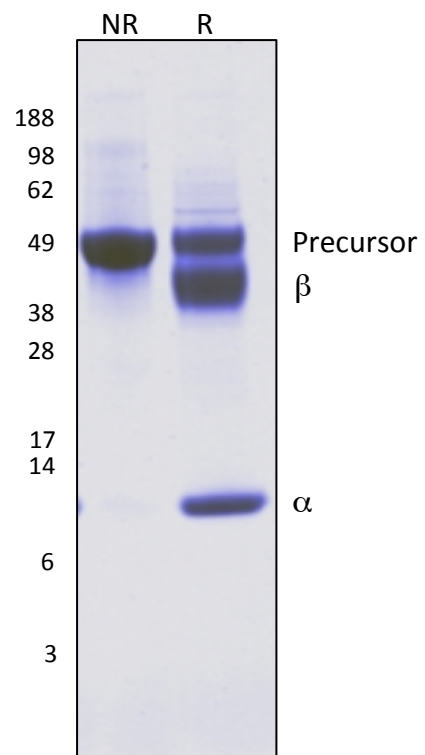

Supplemental Fig. 2

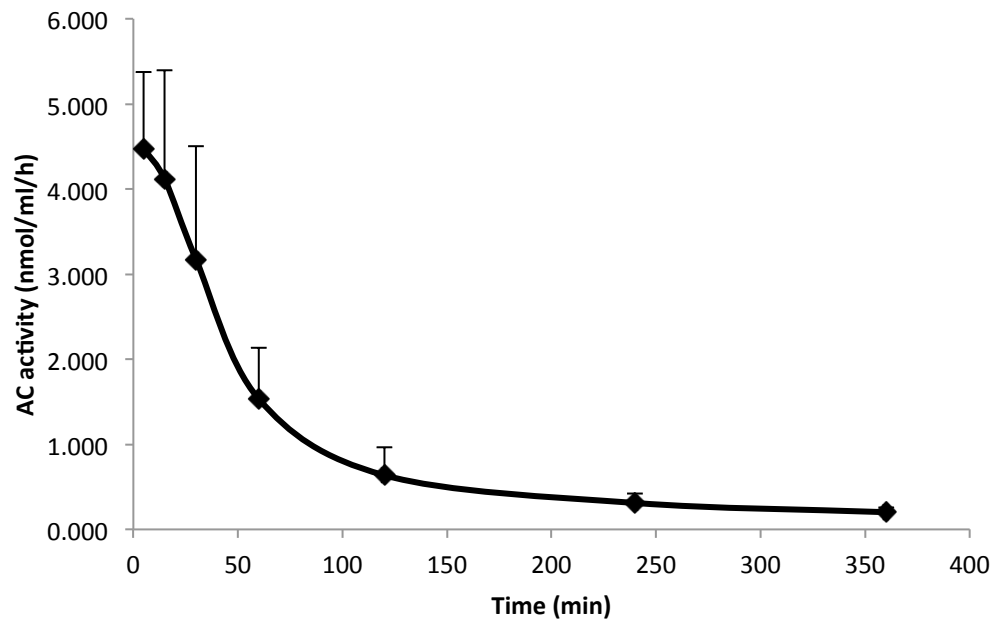

Supplemental Fig. 3

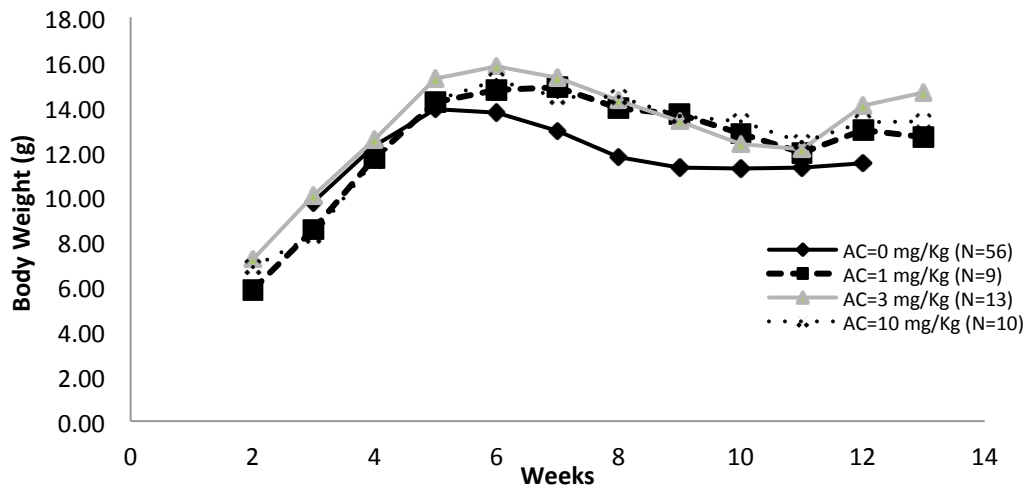

Supplemental Fig. 4

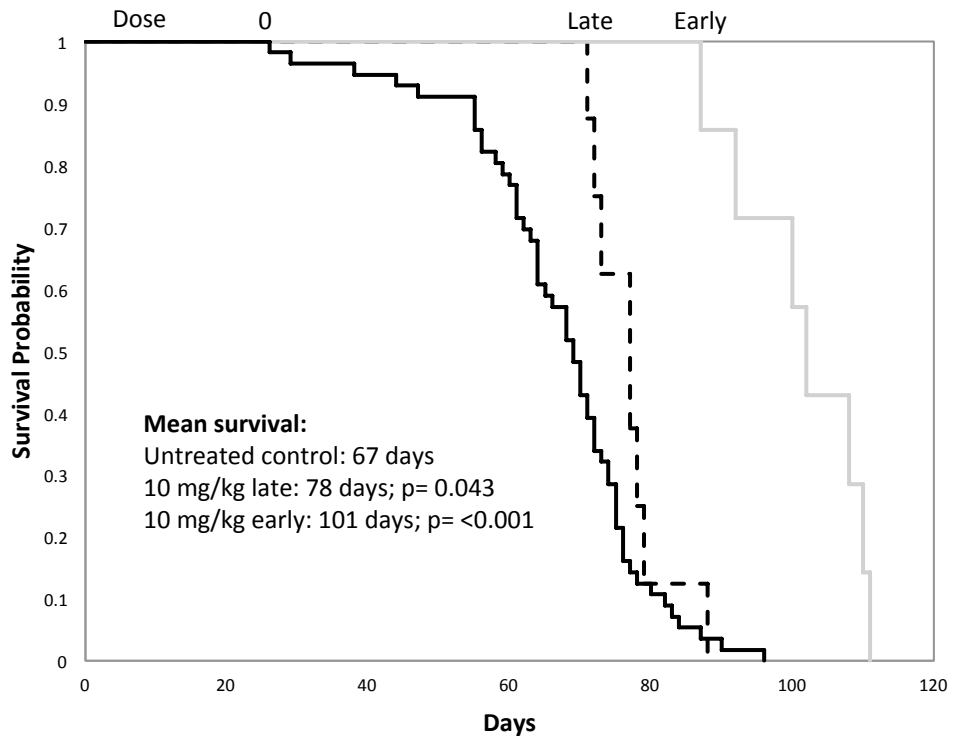

Supplemental Fig. 5

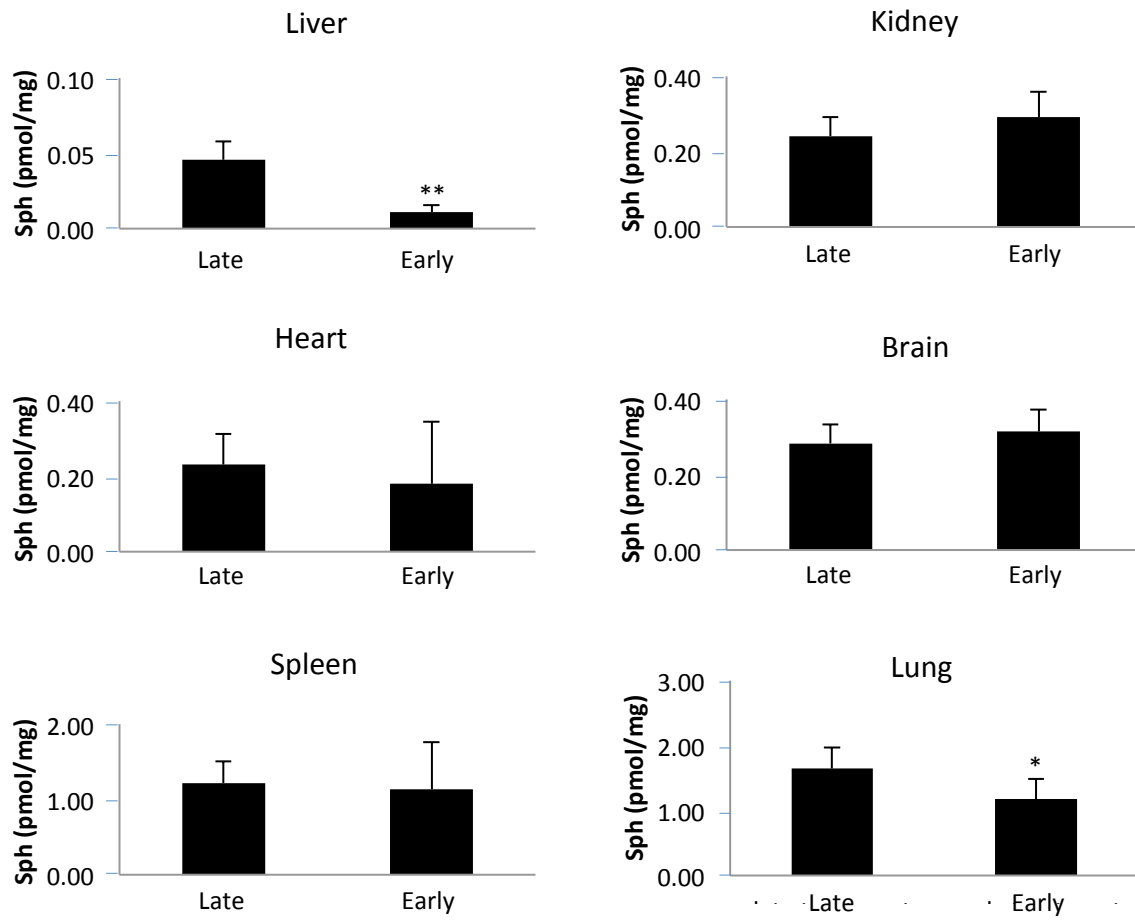

Supplement: mmc2.pdf [file mmc2.pdf]
